# Supplementary material for: Ferroptosis-Related Genes Are Potential Therapeutic Targets and the Model of These Genes Influences Overall Survival of NSCLC Patients
Source: MDPI journal article supplement (doi:10.3390/cells11142207), 2022-07-15
Supplement: s1 [file s1]

**Table S1 Information of 60 ferroptosis-related genes.**

| <b>Table S1. Information of 60 ferroptosis-related genes</b> |                         |                                 |                          |              |
|--------------------------------------------------------------|-------------------------|---------------------------------|--------------------------|--------------|
| <b>Iron Metabolism</b>                                       | <b>Lipid Metabolism</b> | <b>(Anti)oxidant Metabolism</b> | <b>Energy Metabolism</b> | <b>Other</b> |
| FANCD2                                                       | ACSL4                   | GCLC                            | GLS2                     | CD44         |
| NCOA4                                                        | AKR1C1                  | SLC7A11                         | SLC1A5                   | HSPB1        |
| TFRC                                                         | AKR1C2                  | KEAP1                           | GOT1                     | CRYAB        |
| PHKG2                                                        | AKR1C3                  | NQO1                            | G6PD                     | RPL8         |
| HSBP1                                                        | ALOX15                  | ABCC1                           | PGD                      | SAT1         |
| ACO1                                                         | ALOX5                   | CHAC1                           | ATP5G3                   | TP53         |
| FTH1                                                         | ALOX12                  | GSS                             |                          | EMC2         |
| STEAP3                                                       | CARS                    | GCLM                            |                          | AIFM2        |
| NFS1                                                         | CBS                     | NFE2L2                          |                          |              |
| IREB2                                                        | CISD1                   | NOX1                            |                          |              |
| HMOX1                                                        | CS                      |                                 |                          |              |
| MT1G                                                         | DPP4                    |                                 |                          |              |
|                                                              | HMGCR                   |                                 |                          |              |
|                                                              | GPX4                    |                                 |                          |              |
|                                                              | LPCAT3                  |                                 |                          |              |
|                                                              | FDFT1                   |                                 |                          |              |
|                                                              | ACSL3                   |                                 |                          |              |
|                                                              | PEBP1                   |                                 |                          |              |
|                                                              | ZEB1                    |                                 |                          |              |

|  |       |  |  |  |
|--|-------|--|--|--|
|  | SQLE  |  |  |  |
|  | FADS2 |  |  |  |
|  | ACSF2 |  |  |  |
|  | PTGS2 |  |  |  |
|  | ACACA |  |  |  |

**Table S2 Multivariate analysis of the correlation of ferroptosis score with outcomes among LUAD and LUSCC in TCGA cohorts. \*, P < 0.05. \*\*, P < 0.01. \*\*\*, P < 0.001.**

| variable                  | Univariate Cox analysis |                              |          |                |        |          | Multivariate Cox analysis |                               |          |                 |        |         |
|---------------------------|-------------------------|------------------------------|----------|----------------|--------|----------|---------------------------|-------------------------------|----------|-----------------|--------|---------|
|                           | coef                    | HR (95%CI)                   | HR       | 95%CI          | z      | P-value  | coef                      | HR (95%CI)                    | HR       | 95%CI           | z      | P-value |
| TCGA-LUAD (Over Survival) |                         |                              |          |                |        |          |                           |                               |          |                 |        |         |
| pathologic_N(N1 VS N0)    | 0.87                    | 2.392<br>(1.7000-3.365)      | 2.39     | (1.7000-3.365) | 5.01   | 5.56E-07 | 1.14E-01                  | 1.121<br>(0.53238-2.360)      | 1.12E+00 | (0.53238-2.360) | 0.32   | 0.7640  |
| pathologic_N(N2 VS N0)    | 1.11                    | 3.046<br>(2.0843-4.452)      | 3.05     | (2.0843-4.452) | 5.75   | 8.75E-09 | -8.93E-02                 | 0.9145<br>(0.31343-2.668)     | 9.15E-01 | (0.31343-2.668) | -0.164 | 0.8701  |
| pathologic_N(N3 VS N0)    | -1.48E+01               | 0.0000003817<br>(0.0000-Inf) | 3.82E-07 | (0.0000-Inf)   | -0.007 | 0.994    | -1.55E+01                 | 0.0000001811<br>(0.00000-Inf) | 1.81E-07 | (0.00000-Inf)   | -0.007 | 0.9947  |
| pathologic_N(NX VS N0)    | 3.49E-01                | 1.417<br>(0.5194-3.868)      | 1.42E+00 | (0.5194-3.868) | 0.681  | 0.496    | 3.18E-01                  | 1.374<br>(0.32848-5.747)      | 1.37E+00 | (0.32848-5.747) | 0.435  | 0.6634  |
| pathologic_T(T1a VS T1)   | 0.5432                  | 1.7215<br>(0.8302-3.570)     | 1.721    | (0.8302-3.570) | 1.46   | 0.14432  | 1.03E+00                  | 2.799<br>(1.20113-6.524)      | 2.80E+00 | (1.20113-6.524) | 2.384  | 0.0171  |
| pathologic_T(T1b VS T1)   | 0.1112                  | 1.1176<br>(0.5096-2.451)     | 1.117    | (0.5096-2.451) | 0.278  | 0.78132  | 4.33E-01                  | 1.542<br>(0.64942-3.662)      | 1.54E+00 | (0.64942-3.662) | 0.982  | 0.3263  |
| pathologic_T(T2 VS T1)    | 0.5989                  | 1.8201                       | 1.820    | (1.1474-2.8    | 2.5    | 0.01095  | 1.01E                     | 2.753                         | 2.75E    | (1.32726-5.     | 2.7    | 0.0065  |

|                                             |        |                  |       |             |      |          |        |                  |       |             |      |        |
|---------------------------------------------|--------|------------------|-------|-------------|------|----------|--------|------------------|-------|-------------|------|--------|
|                                             |        | (1.1474-2.887)   | 1     | 87)         | 44   | 3 *      | +00    | (1.32726-5.710)  | +00   | 710)        | 21   | 2 **   |
| pathologic_T(T2a VS T1)                     | 0.3602 | 1.4337           | 1.433 | (0.7472-2.7 | 1.0  | 0.27861  | 4.35E- | 1.545            | 1.55E | (0.67109-3. | 1.0  | 0.3064 |
|                                             |        | (0.7472-2.751)   | 7     | 51)         | 83   | 4        | 01     | (0.67109-3.559)  | +00   | 559)        | 23   | 2      |
| pathologic_T(T2b VS T1)                     | 0.2666 | 1.3056           | 1.305 | (0.5285-3.2 | 0.5  | 0.56338  | -2.05E | 0.8144           | 8.14E | (0.23931-2. | -0.3 | 0.7425 |
|                                             |        | (0.5285-3.225)   | 6     | 25)         | 78   | 6        | -01    | (0.23931-2.772)  | -01   | 772)        | 29   | 2      |
| pathologic_T(T3 VS T1)                      | 1.2252 | 3.4048           | 3.404 | (1.8681-6.2 | 4.0  | 6.32e-05 | 1.04E  | 2.818            | 2.82E | (0.98572-8. | 1.9  | 0.0532 |
|                                             |        | (1.8681-6.205)   | 8     | 05)         | 01   | ***      | +00    | (0.98572-8.057)  | +00   | 057)        | 33   | 2 .    |
| pathologic_T(T4 VS T1)                      | 1.2391 | 3.4525           | 3.452 | (1.6779-7.1 | 3.3  | 0.00076  | 1.45E  | 4.243            | 4.24E | (1.17148-15 | 2.2  | 0.0277 |
|                                             |        | (1.6779-7.104)   | 5     | 04)         | 66   | 3 ***    | +00    | (1.17148-15.368) | +00   | .368)       | 01   | 4 *    |
| pathologic_T(TX VS T1)                      | 1.7036 | 5.4934           | 5.493 | (1.2771-23. | 2.2  | 0.02210  | 1.09E  | 2.981            | 2.98E | (0.33769-26 | 0.9  | 0.3256 |
|                                             |        | (1.2771-23.631)  | 4     | 631)        | 89   | 8 *      | +00    | (0.33769-26.309) | +00   | .309)       | 83   | 5      |
| radiation_therapy(YES VS NO)                | 0.7707 | 2.1613           | 2.161 | (1.454-3.21 | 3.8  | 0.00014  | 5.12E- | 1.669            | 1.67E | (1.07454-2. | 2.2  | 0.0226 |
|                                             |        | (1.454-3.213)    | 3     | 3)          | 08   | ***      | 01     | (1.07454-2.592)  | +00   | 592)        | 8    | 1 *    |
| tumor_stage.diagnoses(stage ia VS stage i)  | -0.003 | 0.996151         | 0.996 | (0.23670-4. | -0.0 | 0.9958   | 2.31E- | 1.26             | 1.26E | (0.24016-6. | 0.2  | 0.7846 |
|                                             | 856    | (0.23670-4.192)  | 1     | 192)        | 05   |          | 01     | (0.24016-6.610)  | +00   | 610)        | 73   | 6      |
| tumor_stage.diagnoses(stage ib VS stage i)  | 0.1522 | 1.164425         | 1.164 | (0.28058-4. | 0.2  | 0.8339   | -9.78E | 0.9069           | 9.07E | (0.18123-4. | -0.1 | 0.9052 |
|                                             | 27     | (0.28058-4.832)  | 4     | 832)        | 1    |          | -02    | (0.18123-4.538)  | -01   | 538)        | 19   | 9      |
| tumor_stage.diagnoses(stage ii VS stage i)  | 2.0425 | 7.709902         | 7.709 | (0.6925-85. | 1.6  | 0.0967   |        |                  |       |             |      |        |
|                                             | 05     | (0.6925-85.836)  | 9     | 836)        | 61   |          |        |                  |       |             |      |        |
| tumor_stage.diagnoses(stage iia VS stage i) | 1.1453 | 3.143478         | 3.143 | (0.7332-13. | 1.5  | 0.123    | 1.38E  | 3.972            | 3.97E | (0.84724-18 | 1.7  | 0.0801 |
|                                             | 3      | (0.73324-13.477) | 4     | 477)        | 42   |          | +00    | (0.84724-18.620) | +00   | .620)       | 5    | 7 .    |
| tumor_stage.diagnoses(stage iib VS stage i) | 0.8682 | 2.382847         | 2.382 | (0.56827-9. | 1.1  | 0.2351   | 5.37E- | 1.71             | 1.71E | (0.38265-7. | 0.7  | 0.4823 |
|                                             | 96     | (0.56827-9.992)  | 8     | 992)        | 87   |          | 01     | (0.38265-7.645)  | +00   | 645)        | 03   | 3      |
| tumor_stage.diagnoses(stage iia VS stage i) | 1.3885 | 4.008833         | 4.008 | (0.96237-16 | 1.9  | 0.0565   | 1.15E  | 3.149            | 3.15E | (0.57935-17 | 1.3  | 0.1841 |
|                                             |        | (0.96237-16.699) | 8     | .699)       | 07   |          | +00    | (0.57935-17.116) | +00   | .116)       | 28   | 7      |
| tumor_stage.diagnoses(stage                 | 1.0211 | 2.776259         | 2.776 | (0.56012-13 | 1.2  | 0.2112   | 1.36E- | 1.014            | 1.01E | (0.11249-9. | 0.0  | 0.9903 |

|                             |        |                    |       |             |     |                |        |                 |       |             |      |               |
|-----------------------------|--------|--------------------|-------|-------------|-----|----------------|--------|-----------------|-------|-------------|------|---------------|
| iiib VS stage i)            | 04     | (0.56012-13.761)   | 2     | .761)       | 5   |                | 02     | (0.11249-9.135) | +00   | 135)        | 12   |               |
| tumor_stage.diagnoses(stage | 1.4214 | 4.142964           | 4.142 | (0.9471-18. | 1.8 | 0.059          | 8.77E- | 2.404           | 2.40E | (0.48634-11 | 1.0  | 0.2819        |
| iV VS stage i)              | 12     | (0.94718-18.121)   | 9     | 121)        | 88  |                | 01     | (0.4863-11.886) | +00   | .886)       | 76   | 8             |
| <b>Ferroptosis score</b>    | 0.0876 | 1.09165            | 1.091 | (1.05-1.135 | 4.4 | <b>1.06E-0</b> | 5.45E- | 1.056           | 1.06E | (1.00634-1. | 2.2  | <b>0.0266</b> |
|                             | 9      | (1.05-1.135)       | 6     | )           | 06  | <b>5 ***</b>   | 02     | (1.0063-1.108)  | +00   | 108)        | 17   | <b>2 *</b>    |
| TCGA-LUSC (Over Survival)   |        |                    |       |             |     |                |        |                 |       |             |      |               |
| pathologic_N(N1 VS N0)      | 0.0647 | 1.0669             | 1.066 | (0.7795-1.4 | 0.4 | 0.686          | 2.80E- | 1.324           | 1.32E | (0.65738-2. | 0.7  |               |
|                             | 5      | (0.7795-1.460)     | 9     | 60)         | 04  |                | 01     | (0.65738-2.665) | +00   | 665)        | 85   | 0.4323        |
| pathologic_N(N2 VS N0)      | 0.2737 | 1.3149             | 1.314 | (0.8285-2.0 | 1.1 | 0.245          | 5.33E- | 1.704           | 1.70E | (0.46353-6. | 0.8  |               |
|                             | 6      | (0.8285-2.087)     | 9     | 87)         | 62  |                | 01     | (0.46353-6.267) | +00   | 267)        | 03   | 0.4222        |
| pathologic_N(N3 VS N0)      | 0.9141 | 2.49467            | 2.494 | (0.6139-10. | 1.2 | 0.201          | -1.41E | 0.0000007243    | 7.24E | (0.00000-In | -0.0 |               |
|                             | 6      | (0.6139-10.138)    | 6     | 138)        | 78  |                | +01    | (0.00000-In     | -07   | f)          | 05   | 0.9958        |
| pathologic_N(NX VS N0)      | 0.3548 | 1.42592            | 1.425 | (0.3520-5.7 | 0.4 | 0.619          | -1.54E | 0.0000001964    | 1.96E | (0.00000-In | -0.0 |               |
|                             | 2      | (0.3520-5.776)     | 9     | 76)         | 97  |                | +01    | (0.00000-In     | -07   | f)          | 07   | 0.9942        |
| pathologic_T(T1a VS T1)     | 0.3959 | 1.485750.6642-3.32 | 1.485 | (0.6642-3.3 | 0.9 | 0.33513        | 6.19E- | 1.857           | 1.86E | (0.71870-4. | 1.2  |               |
|                             | 2      | 4                  | 5     | 24)         | 64  |                | 01     | (0.71870-4.801) | +00   | 801)        | 78   | 0.2012        |
| pathologic_T(T1b VS T1)     | 0.0727 | 1.07542            | 1.075 | (0.5140-2.2 | 0.1 | 0.84695        | 4.46E- | 1.561           | 1.56E | (0.70477-3. | 1.0  |               |
|                             | 1      | (0.5140-2.250)     | 4     | 50)         | 93  |                | 01     | (0.70477-3.459) | +00   | 459)        | 98   | 0.2723        |
| pathologic_T(T2 VS T1)      | 0.2472 | 1.28051            | 1.280 | (0.8155-2.0 | 1.0 | 0.28282        | 1.52E- | 1.164           | 1.16E | (0.41915-3. | 0.2  |               |
|                             | 6      | (0.8155-2.011)     | 5     | 11)         | 74  |                | 01     | (0.41915-3.234) | +00   | 234)        | 92   | 0.7705        |
| pathologic_T(T2a VS T1)     | 0.3204 | 1.37772            | 1.377 | (0.8035-2.3 | 1.1 | 0.2441         | 2.88E- | 1.334           | 1.33E | (0.48803-3. | 0.5  |               |
|                             | 3      | (0.8035-2.362)     | 7     | 62)         | 65  |                | 01     | (0.48803-3.646) | +00   | 646)        | 62   | 0.5744        |
| pathologic_T(T2b VS T1)     | 0.5307 | 1.70014            | 1.700 | (0.8043-3.5 | 1.3 | 0.1646         | 5.24E- | 1.689           | 1.69E | (0.50755-5. | 0.8  |               |
|                             | 1      | (0.8043-3.594)     | 1     | 94)         | 9   |                | 01     | (0.50755-5.622) | +00   | 622)        | 55   | 0.3928        |
| pathologic_T(T3 VS T1)      | 0.6757 | 1.96543            | 1.965 | (1.1694-3.3 | 2.5 | 0.01076        | 8.11E- | 2.25            | 2.25E | (0.60014-8. | 1.2  | 0.2291        |

|                                              |        |                 |       |             |      |                |        |                  |       |             |             |               |
|----------------------------------------------|--------|-----------------|-------|-------------|------|----------------|--------|------------------|-------|-------------|-------------|---------------|
|                                              | 1      | (1.1694-3.303)  | 4     | 03)         | 5    | *              | 01     | (0.60014-8.437)  | +00   | 437)        | 03          |               |
| pathologic_T(T4 VS T1)                       | 0.9226 | 2.51597         | 2.515 | (1.2829-4.9 | 2.6  | 0.00725        | 1.23E  | 3.415            | 3.42E | (0.61303-19 | 1.4         |               |
|                                              | 6      | (1.2829-4.934)  | 9     | 34)         | 85   | **             | +00    | (0.61303-19.028) | +00   | .028)       | 02          | 0.161         |
| radiation_therapy(YES VS NO)                 | 0.168  | 1.183           | 1.183 | (0.7469-1.8 | 0.7  | 0.474          | 2.37E- | 1.268            | 1.27E | (0.75498-2. | 0.8         |               |
|                                              |        | (0.7469-1.874)  |       | 74)         | 16   |                | 01     | (0.75498-2.130)  | +00   | 130)        | 98          | 0.3694        |
| tumor_stage.diagnoses(stage ia VS stage i)   | -0.716 | 0.4885          | 0.488 | (0.1169-2.0 | -0.9 | 0.3262         | -3.38E | 0.7134           | 7.13E | (0.09883-5. | -0.3        |               |
|                                              | 4      | (0.1169-2.042)  | 5     | 42)         | 82   |                | -01    | (0.09883-5.150)  | -01   | 150)        | 35          | 0.7378        |
| tumor_stage.diagnoses(stage ib VS stage i)   | -0.477 | 0.6202          | 0.620 | (0.1514-2.5 | -0.6 | 0.5066         | -1.03E | 0.9022           | 9.02E | (0.16713-4. | -0.1        |               |
|                                              | 8      | (0.1514-2.540)  | 2     | 40)         | 64   |                | -01    | (0.16713-4.871)  | -01   | 871)        | 2           | 0.9048        |
| tumor_stage.diagnoses(stage ii VS stage i)   | 0.2744 | 1.3158          | 1.315 | (0.1850-9.3 | 0.2  | 0.784          | -1.50E | 0.0000003007     | 3.01E | (0.00000-In | -0.0        |               |
|                                              |        | (0.1850-9.357)  | 8     | 57)         | 74   |                | +01    | (0.00000-In      | -07   | f)          | 04          | 0.9965        |
| tumor_stage.diagnoses(stage iia VS stage i)  | -0.471 | 0.6239          | 0.623 | (0.1461-2.6 | -0.6 | 0.5243         | -3.20E | 0.7263           | 7.26E | (0.13796-3. | -0.3        |               |
|                                              | 7      | (0.1461-2.665)  | 9     | 65)         | 37   |                | -01    | (0.13796-3.823)  | -01   | 823)        | 77          | 0.7059        |
| tumor_stage.diagnoses(stage iib VS stage i)  | -0.405 | 0.6664          | 0.666 | (0.1606-2.7 | -0.5 | 0.5761         | -1.80E | 0.8349           | 8.35E | (0.18812-3. | -0.2        |               |
|                                              | 9      | (0.1606-2.765)  | 4     | 65)         | 59   |                | -01    | (0.18812-3.706)  | -01   | 706)        | 37          | 0.8125        |
| tumor_stage.diagnoses(stage iii VS stage i)  | 1.6102 | 5.004           | 5.004 | (0.8281-30. | 1.7  | 0.0794         |        |                  |       |             |             |               |
|                                              |        | (0.8281-30.238) |       | 238)        | 54   |                |        |                  |       |             |             |               |
| tumor_stage.diagnoses(stage iiia VS stage i) | -0.222 | 0.8009          | 0.800 | (0.1917-3.3 | -0.3 | 0.7608         | 6.14E- | 0.5412           | 5.41E | (0.12128-2. | -0.8        |               |
|                                              | 1      | (0.1917-3.346)  | 9     | 46)         | 04   |                | 01     | (0.12128-2.415)  | -01   | 415)        | 05          | 0.421         |
| tumor_stage.diagnoses(stage iiib VS stage i) | 0.114  | 1.1207          | 1.120 | (0.2417-5.1 | 0.1  | 0.8842         | -1.19E | 0.3038           | 3.04E | (0.03094-2. | -1.0        |               |
|                                              |        | (0.2417-5.197)  | 7     | 97)         | 46   |                | +00    | (0.03094-2.984)  | -01   | 984)        | 22          | 0.3067        |
| tumor_stage.diagnoses(stage iV VS stage i)   | 0.6685 | 1.9513          | 1.951 | (0.3775-10. | 0.7  | 0.4251         | 4.49E- | 1.566            | 1.57E | (0.25045-9. | 0.4         |               |
|                                              |        | (0.3775-10.087) | 3     | 087)        | 98   |                | 01     | (0.25045-9.794)  | +00   | 794)        | 8           | 0.6314        |
| <b>Ferroptosis score</b>                     | -0.024 | 0.97596         | 0.975 | (0.9331-1.0 | -1.0 | <b>1.28E-0</b> | -5.59E | 0.9457           | 9.46E | (0.89263-1. | <b>-1.8</b> | <b>0.0377</b> |
|                                              | 33     | (0.9331-1.021)  | 9     | 21)         | 61   | <b>5 ***</b>   | -02    | (0.89263-1.002)  | -01   | 002)        | <b>98</b>   | <b>*</b>      |

**Table S3 86 differentially expressed genes list**

|                                        |
|----------------------------------------|
| 86 differentially expressed genes list |
| AKR1C3                                 |
| AKR1C1                                 |
| GPX2                                   |
| NQO1                                   |
| AKR1B10                                |
| ALDH3A1                                |
| GSTA1                                  |
| ADH1C                                  |
| TSPAN8                                 |
| MSMB                                   |
| LCN2                                   |
| NTS                                    |
| SCGB1A1                                |
| MT1E                                   |
| AQP5                                   |
| MMP28                                  |
| SLC34A2                                |
| PIGR                                   |
| HPGD                                   |
| C7                                     |
| C4BPA                                  |

|         |
|---------|
| DMBT1   |
| CYP4B1  |
| MMP13   |
| TXNRD1  |
| PGD     |
| G6PD    |
| OSGIN1  |
| TALDO1  |
| GCLM    |
| SLC7A11 |
| CYP4F11 |
| TRIM16  |
| GCLC    |
| ME1     |
| GSR     |
| CABYR   |
| TXN     |
| CYP4F3  |
| UCHL1   |
| NR0B1   |
| CBR3    |
| UGDH    |
| PIR     |
| TSKU    |
| CBR1    |

|          |
|----------|
| MAP2     |
| TSPAN7   |
| KIAA0319 |
| ABCC2    |
| PFN2     |
| ODC1     |
| SPP1     |
| ICAM1    |
| CST6     |
| CDH3     |
| DPP4     |
| TFPI2    |
| CRABP2   |
| ABCB6    |
| PRDX1    |
| RIT1     |
| TKT      |
| ABCC1    |
| ALDH3A2  |
| MEGF9    |
| AKR1C4   |
| TPD52L1  |
| EPHX1    |
| ADH7     |
| ADAM23   |



|          |
|----------|
| HGD      |
| GSTM3    |
| SCN9A    |
| ALDH1A1  |
| ANXA10   |
| FZD10    |
| ABCC3    |
| SERPINB5 |
| CA12     |
| FXVD3    |
| CLDN8    |
| PI3      |
| PKP1     |
| S100P    |
| KRT6A    |
